# Supplementary material
Source: MDPI journal article supplement (https://www.mdpi.com/2072-4292/8/11/901)
Supplement: s1 [file s1]

# Supplementary Materials: Differential Heating in the Indian Ocean Differentially Modulates Precipitation in the Ganges and Brahmaputra Basins

Md Shahriar Pervez and Geoffrey M. Henebry

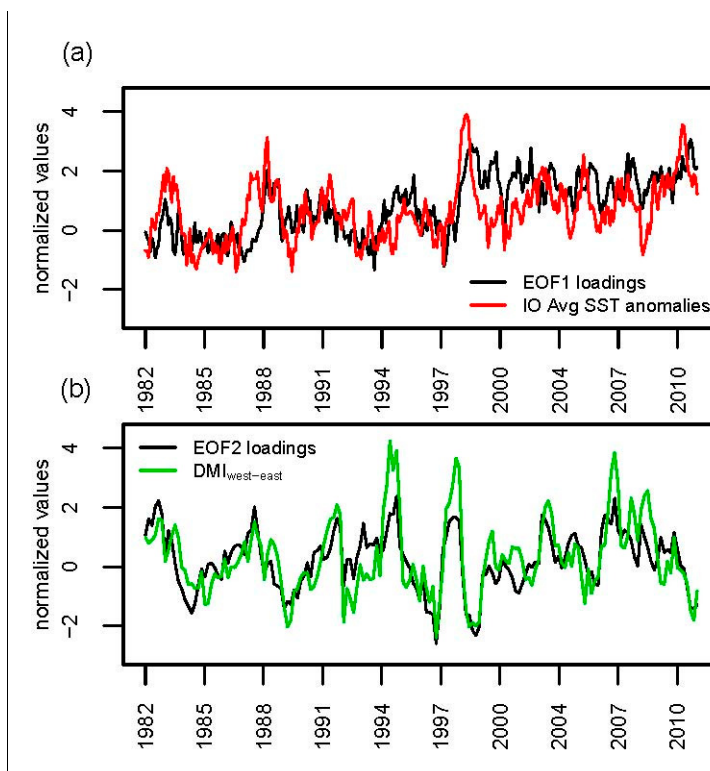

**Figure S1.** Temporal dynamics of the first two empirical orthogonal function (EOF) modes: (a) Loadings of the first mode (EOF1) (black) and average Indian Ocean (up to 20°S) Sea Surface Temperature (red); (b) Loadings of the second mode (EOF2) (black) and Differential Heating Index at west-east direction (DHI<sub>west-east</sub>) (green). The values are normalized relative to 1982–2010, (a) is optimized for January–December averages; and (b) is optimized for June–November averages.

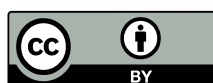

© 2016 by the authors; licensee MDPI, Basel, Switzerland. This article is an open access article distributed under the terms and conditions of the Creative Commons Attribution (CC-BY) license (<http://creativecommons.org/licenses/by/4.0/>).
